# Supplementary material for: Ethanol conversion over Ga2O3–ZrO2solid solution: empirical evidence of the reaction pathway, the surface acid–base properties, and the role of gallium ions
Source: Royal Society of Chemistry journal article supplement (doi:10.1039/d0cy02271c), 2020-12-18
Supplement: d0cy02271c1.pdf [file d0cy02271c1.pdf]

Ethanol conversion over Ga<sub>2</sub>O<sub>3</sub>–ZrO<sub>2</sub> solid solution: empirical evidences of the reaction pathway, the surface acid–base property, and role of gallium ion

*Takashi Yamamoto<sup>1,2,\*</sup>, Akihito Kurimoto<sup>2</sup>, Riona Sato<sup>2</sup>, Shoki Katada<sup>1</sup>, Hirotaka Mine<sup>1</sup>, Naoto Tanima<sup>2</sup>, and Ryota Kamata<sup>2</sup>*

<sup>1</sup>Department of Natural Science, Faculty of Science and Technology, Tokushima University, Tokushima 770-8506, Japan

<sup>2</sup>Department of Mathematical and Material Sciences, Faculty of Integrated Arts and Sciences, Tokushima University, Tokushima 770-8502, Japan

†To whom correspondence should be addressed.

E-mail: takashi-yamamoto.ias@tokushima-u.ac.jp

**Table S1:** Results of ethanol conversion at different contact time and reaction temperature.

| <i>T</i> = 573 K         |              |                 |     |     |     |      |     |          |         |          |      |      |       |         |       |                 |
|--------------------------|--------------|-----------------|-----|-----|-----|------|-----|----------|---------|----------|------|------|-------|---------|-------|-----------------|
| GHSV<br>/h <sup>-1</sup> | Conv.<br>(%) | Yield (%)       |     |     |     |      |     |          |         |          |      |      |       |         |       |                 |
|                          |              | CH <sub>4</sub> | DEE | C2  | C2' | C3'  | AcH | 1-,2-C4' | iso-C4' | 1,3-C4'' | AcMe | AcOH | AcOEt | C3,4-ol | C4-al | CO <sub>2</sub> |
| 96,109                   | 0.2          | 0.0             | 0.0 | 0.0 | 0.0 | 0.0  | 0.2 | 0.0      | 0.0     | 0.0      | 0.0  | 0.0  | 0.0   | 0.0     | 0.0   | 0.0             |
| 26,492                   | 0.7          | 0.0             | 0.0 | 0.0 | 0.0 | 0.0  | 0.3 | 0.0      | 0.1     | 0.0      | 0.0  | 0.0  | 0.2   | 0.0     | 0.0   | 0.0             |
| 9,515                    | 1.2          | 0.0             | 0.0 | 0.0 | 0.1 | 0.0  | 0.5 | 0.0      | 0.1     | 0.0      | 0.1  | 0.0  | 0.3   | 0.0     | 0.0   | 0.0             |
| 4,746                    | 2.1          | 0.0             | 0.0 | 0.1 | 0.1 | 0.0  | 0.7 | 0.0      | 0.3     | 0.0      | 0.5  | 0.0  | 0.5   | 0.0     | 0.0   | 0.0             |
| 1,315                    | 8.8          | 0.0             | 0.0 | 0.1 | 0.5 | 0.2  | 1.1 | 0.0      | 0.4     | 0.0      | 2.1  | 0.0  | 0.8   | 0.8     | 0.0   | 2.9             |
| 238                      | 24.6         | 0.0             | 0.0 | 0.0 | 1.1 | 1.7  | 1.3 | 0.0      | 0.5     | 0.1      | 6.6  | 0.2  | 0.6   | 3.9     | 0.1   | 8.5             |
| <i>T</i> = 623 K         |              |                 |     |     |     |      |     |          |         |          |      |      |       |         |       |                 |
| GHSV<br>/h <sup>-1</sup> | Conv.<br>(%) | Yield (%)       |     |     |     |      |     |          |         |          |      |      |       |         |       |                 |
|                          |              | CH <sub>4</sub> | DEE | C2  | C2' | C3'  | AcH | 1-,2-C4' | iso-C4' | 1,3-C4'' | AcMe | AcOH | AcOEt | C3,4-ol | C4-al | CO <sub>2</sub> |
| 96,109                   | 1.5          | 0.0             | 0.0 | 0.0 | 0.1 | 0.0  | 0.7 | 0.0      | 0.3     | 0.0      | 0.2  | 0.0  | 0.1   | 0.0     | 0.0   | 0.0             |
| 26,492                   | 5.7          | 0.0             | 0.0 | 0.1 | 0.5 | 0.0  | 1.9 | 0.0      | 0.9     | 0.0      | 1.9  | 0.0  | 0.4   | 0.0     | 0.0   | 0.0             |
| 9,515                    | 12.8         | 0.0             | 0.0 | 0.1 | 0.9 | 0.1  | 3.0 | 0.0      | 1.3     | 0.0      | 3.9  | 0.0  | 0.7   | 0.0     | 0.0   | 2.9             |
| 4,746                    | 23.4         | 0.0             | 0.0 | 0.0 | 1.7 | 0.2  | 4.2 | 0.0      | 2.6     | 0.2      | 8.4  | 0.1  | 0.7   | 0.0     | 0.1   | 5.2             |
| 1,315                    | 73.4         | 0.0             | 0.0 | 0.0 | 4.1 | 5.6  | 1.9 | 0.2      | 0.1     | 0.0      | 30.0 | 1.3  | 0.0   | 1.0     | 2.5   | 26.5            |
| 238                      | 98.9         | 0.4             | 0.0 | 0.0 | 5.0 | 16.1 | 0.0 | 0.1      | 2.0     | 0.6      | 30.7 | 2.0  | 0.0   | 0.0     | 4.2   | 37.8            |
| <i>T</i> = 673 K         |              |                 |     |     |     |      |     |          |         |          |      |      |       |         |       |                 |
| GHSV<br>/h <sup>-1</sup> | Conv.<br>(%) | Yield (%)       |     |     |     |      |     |          |         |          |      |      |       |         |       |                 |
|                          |              | CH <sub>4</sub> | DEE | C2  | C2' | C3'  | AcH | 1-,2-C4' | iso-C4' | 1,3-C4'' | AcMe | AcOH | AcOEt | C3,4-ol | C4-al | CO <sub>2</sub> |
| 96,109                   | 11.9         | 0.0             | 0.0 | 0.0 | 1.3 | 0.1  | 3.4 | 0.0      | 1.5     | 0.0      | 5.3  | 0.0  | 0.3   | 0.0     | 0.0   | 0.0             |
| 26,492                   | 51.5         | 0.0             | 0.0 | 0.0 | 3.9 | 1.1  | 5.2 | 0.1      | 1.6     | 0.2      | 22.6 | 0.1  | 0.3   | 1.1     | 0.5   | 14.9            |
| 9,515                    | 75.4         | 0.0             | 0.0 | 0.0 | 5.1 | 2.5  | 4.2 | 0.0      | 3.6     | 0.6      | 32.4 | 0.9  | 0.0   | 1.6     | 1.4   | 23.2            |
| 4,760                    | 100.0        | 0.0             | 0.0 | 0.1 | 6.0 | 5.0  | 1.8 | 0.0      | 1.5     | 0.0      | 42.2 | 1.3  | 0.0   | 2.3     | 2.4   | 37.4            |
| 1,315                    | 99.5         | 1.3             | 0.0 | 0.0 | 7.3 | 8.0  | 0.0 | 0.0      | 6.7     | 0.3      | 37.9 | 2.0  | 0.0   | 1.3     | 2.5   | 32.3            |
| 238                      | 98.9         | 5.5             | 0.0 | 0.0 | 6.9 | 12.6 | 0.0 | 0.1      | 14.0    | 0.0      | 13.5 | 2.1  | 0.0   | 0.0     | 4.2   | 40.1            |
| <i>T</i> = 723 K         |              |                 |     |     |     |      |     |          |         |          |      |      |       |         |       |                 |
| GHSV<br>/h <sup>-1</sup> | Conv.<br>(%) | Yield (%)       |     |     |     |      |     |          |         |          |      |      |       |         |       |                 |
|                          |              | CH <sub>4</sub> | DEE | C2  | C2' | C3'  | AcH | 1-,2-C4' | iso-C4' | 1,3-C4'' | AcMe | AcOH | AcOEt | C3,4-ol | C4-al | CO <sub>2</sub> |
| 96,109                   | 50.9         | 0.1             | 0.0 | 0.0 | 4.3 | 1.5  | 5.3 | 0.1      | 2.8     | 0.0      | 20.7 | 0.1  | 0.2   | 0.0     | 0.4   | 15.6            |
| 26,492                   | 92.7         | 0.7             | 0.0 | 0.0 | 6.3 | 5.0  | 1.8 | 0.7      | 2.4     | 0.0      | 44.6 | 0.1  | 0.0   | 0.6     | 0.5   | 29.7            |
| 9,515                    | 98.4         | 1.7             | 0.0 | 0.0 | 6.3 | 5.5  | 0.6 | 0.6      | 5.0     | 0.0      | 44.2 | 0.2  | 0.0   | 0.6     | 0.7   | 33.0            |
| 4,746                    | 99.6         | 5.0             | 0.1 | 0.0 | 6.6 | 7.2  | 0.0 | 0.1      | 10.7    | 0.0      | 32.9 | 0.0  | 0.0   | 0.5     | 0.0   | 36.5            |
| 1,315                    | 99.8         | 9.6             | 0.0 | 0.0 | 7.1 | 11.3 | 0.0 | 0.0      | 22.1    | 0.0      | 4.7  | 0.4  | 0.0   | 0.1     | 1.5   | 42.9            |
| 238                      | 99.5         | 12.0            | 0.0 | 0.0 | 5.7 | 11.6 | 0.0 | 0.0      | 22.2    | 0.0      | 0.4  | 0.0  | 0.0   | 0.0     | 0.8   | 46.9            |
| <i>T</i> = 773 K         |              |                 |     |     |     |      |     |          |         |          |      |      |       |         |       |                 |
| GHSV<br>/h <sup>-1</sup> | Conv.<br>(%) | Yield (%)       |     |     |     |      |     |          |         |          |      |      |       |         |       |                 |
|                          |              | CH <sub>4</sub> | DEE | C2  | C2' | C3'  | AcH | 1-,2-C4' | iso-C4' | 1,3-C4'' | AcMe | AcOH | AcOEt | C3,4-ol | C4-al | CO <sub>2</sub> |
| 96,109                   | 71.5         | 0.9             | 0.0 | 0.0 | 7.2 | 2.8  | 6.1 | 0.0      | 5.2     | 0.0      | 28.5 | 0.1  | 0.0   | 0.0     | 0.5   | 20.3            |
| 26,492                   | 97.8         | 6.4             | 0.0 | 0.0 | 5.6 | 5.3  | 0.8 | 0.4      | 9.1     | 0.0      | 34.8 | 0.1  | 0.0   | 0.0     | 0.3   | 35.1            |
| 9,515                    | 100.0        | 10.7            | 0.0 | 0.0 | 5.8 | 5.6  | 0.1 | 0.1      | 14.5    | 0.0      | 22.3 | 0.1  | 0.0   | 0.0     | 0.3   | 40.6            |
| 4,746                    | 100.0        | 17.9            | 0.0 | 0.0 | 6.6 | 7.5  | 0.0 | 0.0      | 15.4    | 0.0      | 6.7  | 0.0  | 0.0   | 0.0     | 0.2   | 45.8            |
| 1,315                    | 100.0        | 19.3            | 0.0 | 0.0 | 7.2 | 5.8  | 0.0 | 0.0      | 19.0    | 0.0      | 0.3  | 0.2  | 0.0   | 0.0     | 0.2   | 48.0            |
| 238                      | 99.7         | 19.0            | 0.0 | 0.0 | 3.9 | 5.8  | 0.0 | 0.1      | 21.3    | 0.0      | 0.2  | 0.0  | 0.0   | 0.0     | 0.1   | 49.3            |

Catalyst: Ga<sub>2</sub>O<sub>3</sub>-ZrO<sub>2</sub> 0.05–4 g; ethanol: 5%; H<sub>2</sub>O: 40%; N<sub>2</sub>: balance; total flow rate: 20 or 100 mL·min<sup>-1</sup>. Conv.: ethanol conversion. AcH: acetaldehyde; AcMe: acetone; AcOEt: ethyl acetate; AcOH: acetic acid; C2–C3: sum of ethane and propane; C2': ethene; C3': propene; 1-, 2-C4': sum of 1- and 2-butenes; iso-C4': isobutene; 1,3-C4'': 1,3-butadiene; C4-al: butenals; C4-ol: butanols/butenols; DEE: diethyl ether.

**Table S2:** Results of ethanol conversion catalyzed by metal ion-doped ZrO<sub>2</sub>.

*T* = 573 K

| Doped-<br>element | Conv.<br>(%) | Yield (%)       |     |     |     |     |      |          |         |          |      |      |       |         |       |                 |
|-------------------|--------------|-----------------|-----|-----|-----|-----|------|----------|---------|----------|------|------|-------|---------|-------|-----------------|
|                   |              | CH <sub>4</sub> | DEE | C2  | C2' | C3' | AcH  | 1-,2-C4' | iso-C4' | 1,3-C4'' | AcMe | AcOH | AcOEt | C3,4-ol | C4-al | CO <sub>2</sub> |
| -                 | 0.5          | 0.0             | 0.0 | 0.0 | 0.4 | 0.0 | 0.1  | 0.0      | 0.0     | 0.0      | 0.0  | 0.0  | 0.0   | 0.0     | 0.0   | 0.0             |
| Ca                | 0.5          | 0.0             | 0.0 | 0.0 | 0.4 | 0.0 | 0.1  | 0.0      | 0.0     | 0.0      | 0.0  | 0.0  | 0.0   | 0.0     | 0.0   | 0.0             |
| Sc                | 0.4          | 0.0             | 0.0 | 0.1 | 0.3 | 0.0 | 0.1  | 0.0      | 0.0     | 0.0      | 0.0  | 0.0  | 0.0   | 0.0     | 0.0   | 0.0             |
| Ti                | 0.6          | 0.0             | 0.1 | 0.0 | 0.1 | 0.0 | 0.3  | 0.0      | 0.0     | 0.0      | 0.0  | 0.0  | 0.0   | 0.0     | 0.0   | 0.0             |
| V                 | 6.1          | 0.0             | 0.9 | 0.0 | 2.5 | 0.0 | 2.2  | 0.0      | 0.0     | 0.0      | 0.1  | 0.0  | 0.3   | 0.0     | 0.0   | 0.0             |
| Cr                | 0.4          | 0.0             | 0.0 | 0.0 | 0.1 | 0.0 | 0.2  | 0.0      | 0.0     | 0.0      | 0.0  | 0.0  | 0.1   | 0.0     | 0.0   | 0.0             |
| Mn                | 0.7          | 0.0             | 0.0 | 0.0 | 0.1 | 0.0 | 0.3  | 0.0      | 0.0     | 0.0      | 0.1  | 0.0  | 0.1   | 0.0     | 0.0   | 0.0             |
| Fe                | 0.5          | 0.0             | 0.0 | 0.0 | 0.3 | 0.0 | 0.2  | 0.0      | 0.0     | 0.0      | 0.0  | 0.0  | 0.0   | 0.0     | 0.0   | 0.0             |
| Co                | 0.6          | 0.0             | 0.0 | 0.0 | 0.1 | 0.0 | 0.2  | 0.0      | 0.0     | 0.0      | 0.1  | 0.0  | 0.2   | 0.0     | 0.0   | 0.0             |
| Ni                | 1.9          | 0.0             | 0.0 | 0.0 | 0.0 | 0.0 | 1.0  | 0.0      | 0.0     | 0.0      | 0.1  | 0.0  | 0.7   | 0.0     | 0.0   | 0.0             |
| Cu                | 11.5         | 0.0             | 0.0 | 0.0 | 0.0 | 0.0 | 10.0 | 0.0      | 0.0     | 0.0      | 0.2  | 0.0  | 0.7   | 0.0     | 0.3   | 0.1             |
| Zn                | 5.2          | 0.0             | 0.0 | 0.1 | 0.1 | 0.0 | 1.9  | 0.0      | 0.0     | 0.0      | 1.6  | 0.0  | 0.7   | 0.0     | 0.0   | 0.8             |
| Ga                | 1.9          | 0.0             | 0.0 | 0.0 | 0.1 | 0.0 | 0.9  | 0.0      | 0.0     | 0.0      | 0.1  | 0.0  | 0.8   | 0.0     | 0.0   | 0.0             |

*T* = 723 K

| Doped-<br>element | Conv.<br>(%) | Yield (%)       |     |      |      |      |     |          |         |          |      |      |       |         |       |                 |
|-------------------|--------------|-----------------|-----|------|------|------|-----|----------|---------|----------|------|------|-------|---------|-------|-----------------|
|                   |              | CH <sub>4</sub> | DEE | C2   | C2'  | C3'  | AcH | 1-,2-C4' | iso-C4' | 1,3-C4'' | AcMe | AcOH | AcOEt | C3,4-ol | C4-al | CO <sub>2</sub> |
| -                 | 98.3         | 0.3             | 0.1 | 0.0  | 83.6 | 10.3 | 0.0 | 0.1      | 0.0     | 0.0      | 1.1  | 0.0  | 0.0   | 0.0     | 0.0   | 4.5             |
| Ca                | 98.5         | 0.5             | 0.1 | 0.0  | 85.6 | 8.1  | 0.0 | 0.2      | 0.0     | 0.0      | 1.2  | 0.0  | 0.0   | 0.0     | 0.0   | 4.2             |
| Sc                | 97.9         | 0.2             | 0.1 | 0.0  | 76.7 | 14.1 | 0.0 | 0.0      | 0.0     | 0.0      | 0.9  | 0.0  | 0.0   | 0.0     | 0.0   | 7.9             |
| Ti                | 94.0         | 0.9             | 0.8 | 0.0  | 70.2 | 16.3 | 0.7 | 0.6      | 0.2     | 0.0      | 1.8  | 0.1  | 0.0   | 1.3     | 0.0   | 7.1             |
| V                 | 97.3         | 1.3             | 0.0 | 34.9 | 16.5 | 9.9  | 0.0 | 0.2      | 1.0     | 0.0      | 14.1 | 0.0  | 0.0   | 0.7     | 0.2   | 21.1            |
| Cr                | 99.4         | 10.7            | 0.3 | 0.0  | 31.8 | 8.6  | 0.0 | 0.0      | 1.3     | 0.0      | 23.9 | 0.0  | 0.0   | 0.2     | 0.0   | 23.2            |
| Mn                | 98.4         | 1.2             | 0.1 | 0.0  | 52.8 | 20.9 | 0.0 | 0.3      | 0.3     | 0.0      | 10.8 | 0.0  | 0.0   | 0.0     | 0.0   | 13.6            |
| Fe                | 99.2         | 1.5             | 0.4 | 0.0  | 34.6 | 23.6 | 0.0 | 0.0      | 1.3     | 0.0      | 19.5 | 0.0  | 0.1   | 0.4     | 0.0   | 18.5            |
| Co                | 99.3         | 1.0             | 0.0 | 0.0  | 22.2 | 7.9  | 0.1 | 0.1      | 5.7     | 0.0      | 39.5 | 0.0  | 0.0   | 0.1     | 0.0   | 23.3            |
| Ni                | 98.2         | 1.5             | 0.0 | 0.0  | 9.4  | 3.2  | 0.3 | 0.2      | 7.4     | 0.0      | 51.0 | 0.0  | 0.0   | 0.0     | 0.0   | 27.0            |
| Cu                | 98.5         | 0.3             | 0.5 | 0.0  | 55.9 | 26.4 | 0.2 | 0.0      | 0.0     | 0.0      | 4.1  | 0.0  | 0.0   | 0.6     | 0.0   | 11.9            |
| Zn                | 97.8         | 4.3             | 0.0 | 0.0  | 3.5  | 3.6  | 0.0 | 0.0      | 35.0    | 0.0      | 19.9 | 0.0  | 0.0   | 0.4     | 0.2   | 33.1            |
| Ga                | 99.5         | 3.6             | 0.0 | 0.0  | 4.6  | 4.1  | 0.0 | 0.0      | 17.5    | 0.0      | 39.4 | 0.0  | 0.0   | 0.4     | 0.0   | 30.5            |

Catalyst: 0.2 g; ethanol: 5%; H<sub>2</sub>O: 40%; N<sub>2</sub>: balance; total flow rate: 20 mL·min<sup>-1</sup>.

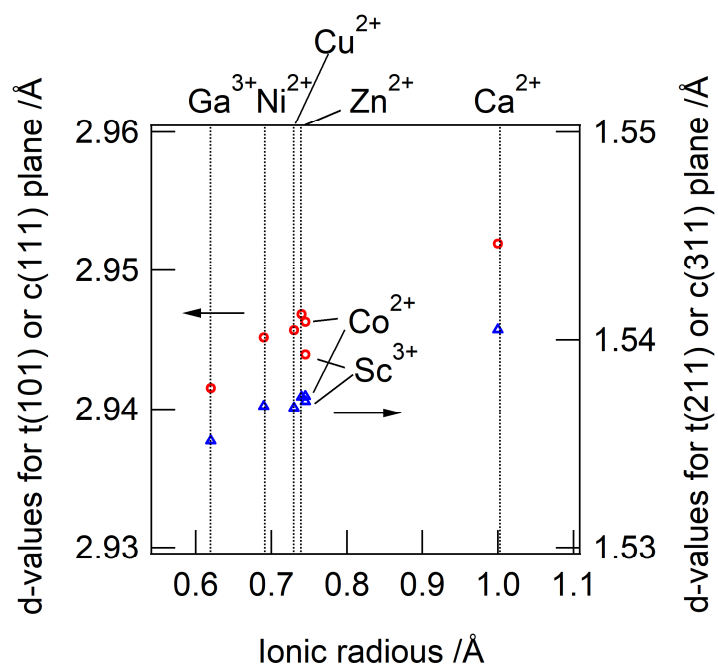

**Fig. S1.** Dependence of ionic radius of doped metal cation to ZrO<sub>2</sub> on *d*-values of the tetragonal/cubic phase. The ionic radius was taken from reference <sup>1</sup> for six-fold coordination.

1. R. D. Shannon, Acta Crystallogr. A, 1976, 32, 751-767.

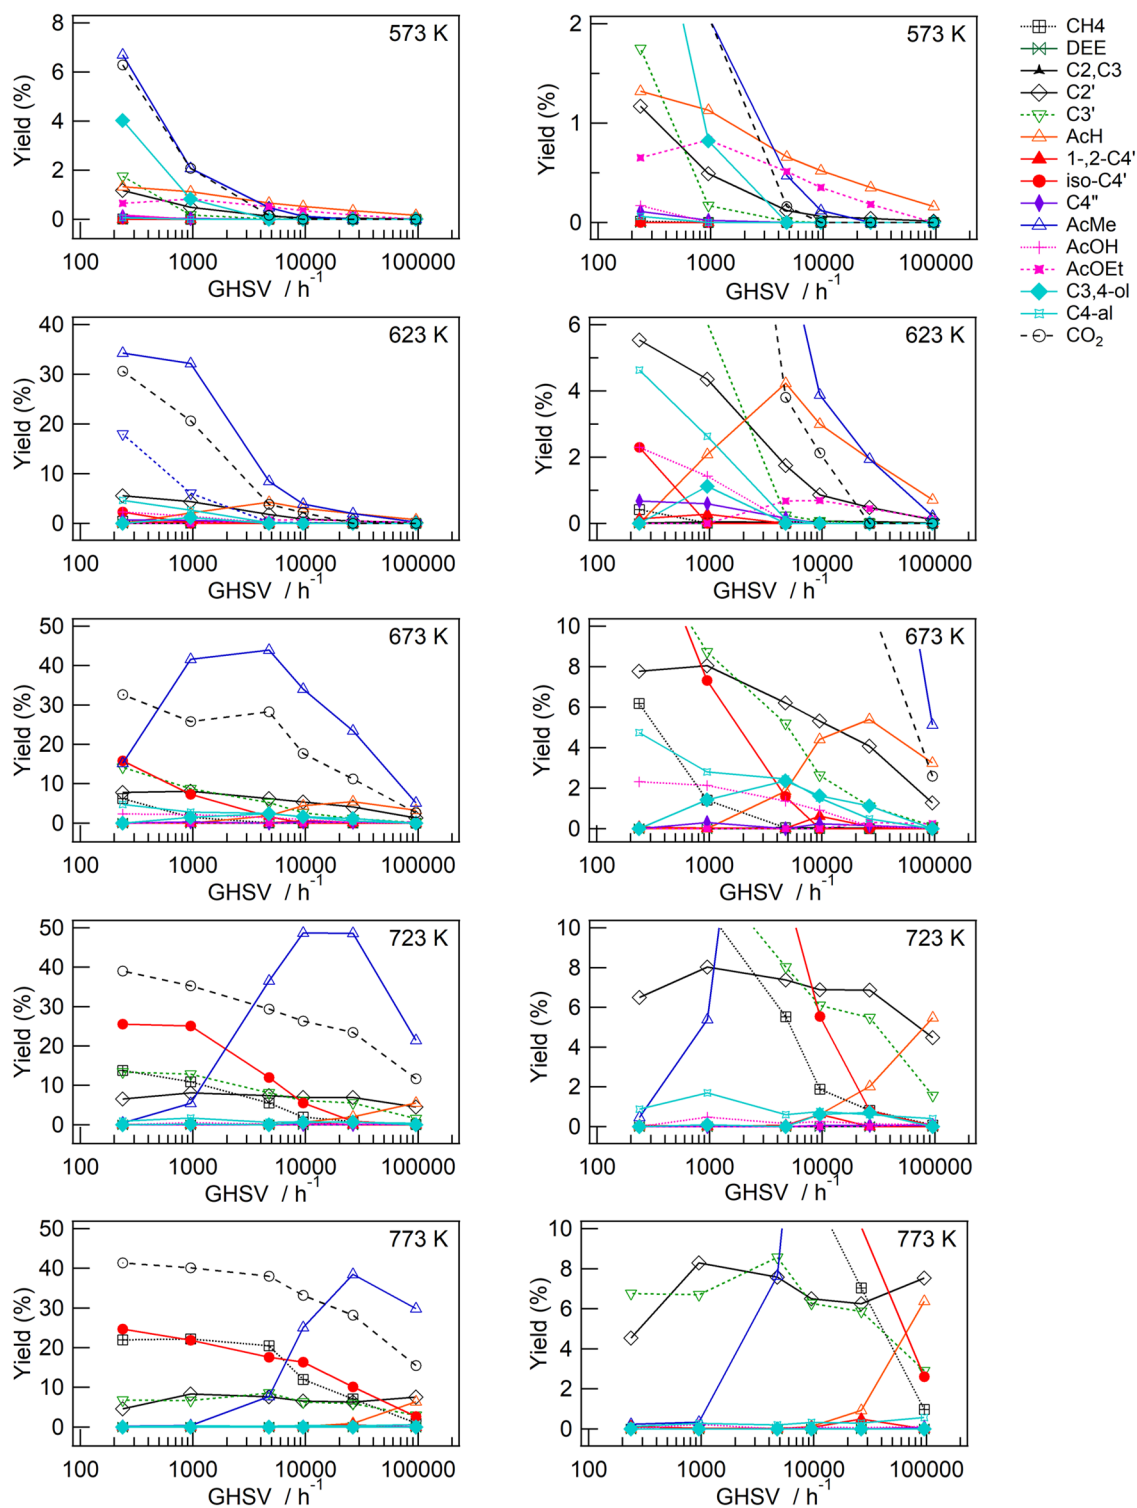

**Fig. S2.** Dependence of space velocity on ethanol conversion at 573 – 773 K. Catalyst: Ga<sub>2</sub>O<sub>3</sub>–ZrO<sub>2</sub> 0.05–4 g; ethanol: 5%; H<sub>2</sub>O: 40%; N<sub>2</sub>: balance; total flow rate: 20 or 100 mL·min<sup>-1</sup>. Conv.: conversion of ethanol; AcH: acetaldehyde; AcMe: acetone; AcOEt: ethyl acetate; AcOH: acetic acid; C2-C3: sum of ethane and propane; C2' : ethene; C3' : propene; 1-, 2-C4' : sum of 1- and 2-butenes; iso-C4' : isobutene; 1,3-C4'' : 1,3-butadiene; C4-al: butenals; C4-ol: butanols/butenols; DEE: diethyl ether.
